# Supplementary material for: Combined radiocarbon and CO2 flux measurements used to determine in situ chlorinated solvent mineralization rate
Source: Royal Society of Chemistry journal article supplement (doi:10.1039/c4em00514g), 2015-01-01

Table: Water quality parameter for March 2013 sampling

| Well  | Na <sup>+</sup><br>(mg L <sup>-1</sup> ) | K <sup>+</sup><br>(mg L <sup>-1</sup> ) | Mg <sup>2+</sup><br>(mg L <sup>-1</sup> ) | Ca <sup>2+</sup><br>(mg L <sup>-1</sup> ) | pH   |
|-------|------------------------------------------|-----------------------------------------|-------------------------------------------|-------------------------------------------|------|
| MW-01 | 131                                      | 18                                      | 32                                        | 58                                        | 7.34 |
| MW-10 | 320                                      | 104                                     | 54                                        | 45                                        | 6.71 |
| MW-11 | 430                                      | 24                                      | 62                                        | 32                                        | 7.84 |
| MW-12 | 774                                      | 45                                      | 109                                       | 50                                        | 7.76 |
| MW-14 | 212                                      | 19                                      | 53                                        | 53                                        | 7.72 |
| MW-17 | 427                                      | 30                                      | 54                                        | 27                                        | 8.00 |
| MW-20 | 535                                      | 50                                      | 56                                        | 26                                        | 7.69 |
| MW-21 | 168                                      | 41                                      | 40                                        | 44                                        | 7.76 |
| MW-24 | 385                                      | 73                                      | 48                                        | 29                                        | 7.74 |
| MW-26 | 404                                      | 101                                     | 39                                        | 14                                        | 7.46 |
| MW-28 | 299                                      | 44                                      | 43                                        | 18                                        | 7.75 |
| MW-30 | 492                                      | 87                                      | 47                                        | 17                                        | 7.67 |
| MW-31 | 269                                      | 22                                      | 43                                        | 32                                        | 7.92 |
| MW-32 | 258                                      | 76                                      | 40                                        | 32                                        | 7.42 |
| MW-33 | 128                                      | 14                                      | 40                                        | 62                                        | 7.92 |
| MW-34 | 377                                      | 48                                      | 47                                        | 30                                        | 7.35 |
| MW-35 | 80                                       | 26                                      | 21                                        | 30                                        | 7.58 |
| MW-38 | 178                                      | 23                                      | 40                                        | 51                                        | 7.82 |
| MW-40 | 77                                       | 10                                      | 18                                        | 38                                        | 7.78 |
| MW-41 | 165                                      | 88                                      | 25                                        | 14                                        | 7.81 |
| MW-42 | 487                                      | 30                                      | 56                                        | 17                                        | 7.58 |
| MW-43 | 136                                      | 18                                      | 37                                        | 74                                        | 7.60 |
| MW-44 | 130                                      | 19                                      | 32                                        | 48                                        | 7.61 |

Table: Water quality parameter for July 2013 sampling

| Well  | Na <sup>+</sup><br>(mg L <sup>-1</sup> ) | K <sup>+</sup><br>(mg L <sup>-1</sup> ) | Mg <sup>2+</sup><br>(mg L <sup>-1</sup> ) | Ca <sup>2+</sup><br>(mg L <sup>-1</sup> ) | pH   |
|-------|------------------------------------------|-----------------------------------------|-------------------------------------------|-------------------------------------------|------|
| MW-01 | 134                                      | 11                                      | 33                                        | 66                                        | 5.87 |
| MW-21 | 190                                      | 44                                      | 20                                        | 33                                        | 6.74 |
| MW-25 | 569                                      | 43                                      | 59                                        | 22                                        | 6.69 |
| MW-26 | 465                                      | 64                                      | 52                                        | 22                                        | 6.40 |
| MW-27 | 513                                      | 80                                      | 62                                        | 25                                        | 6.66 |
| MW-28 | 611                                      | 78                                      | 54                                        | 13                                        | 6.80 |
| MW-30 | 359                                      | 70                                      | 42                                        | 29                                        | 6.54 |
| MW-32 | 936                                      | 39                                      | 78                                        | 13                                        | 6.76 |
| MW-34 | 462                                      | 55                                      | 48                                        | 8                                         | 6.97 |
| MW-38 | 283                                      | 29                                      | 41                                        | 30                                        | 5.13 |
| MW-41 | 306                                      | 120                                     | 45                                        | 29                                        | 6.49 |
| MW-42 | 665                                      | 34                                      | 64                                        | 13                                        | 6.78 |

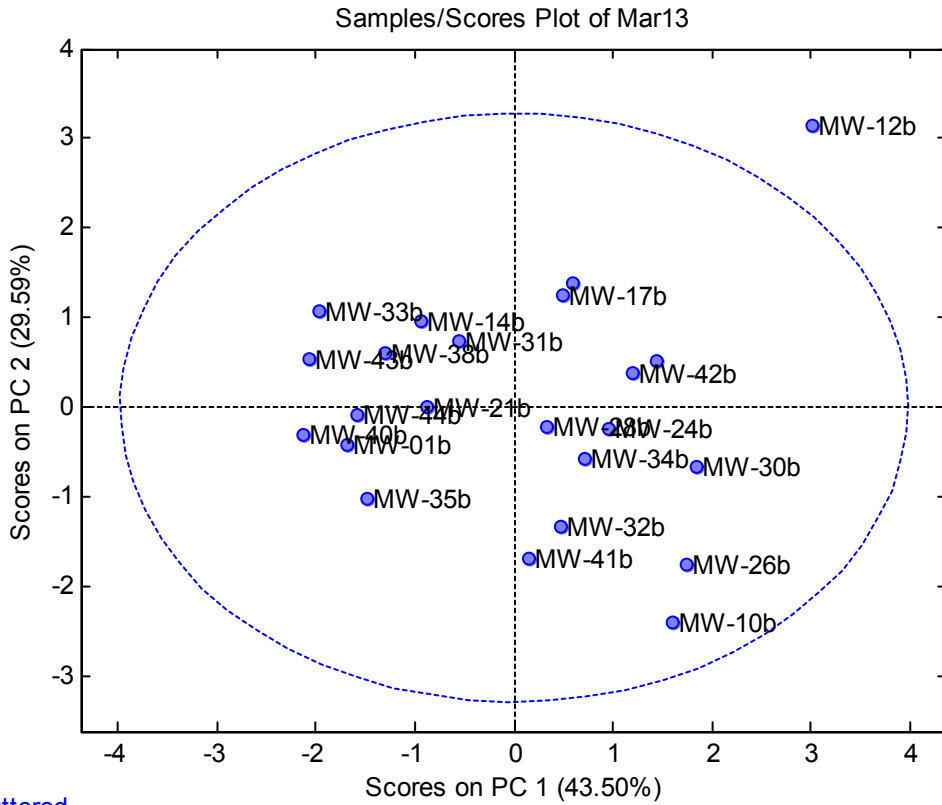

Decluttered

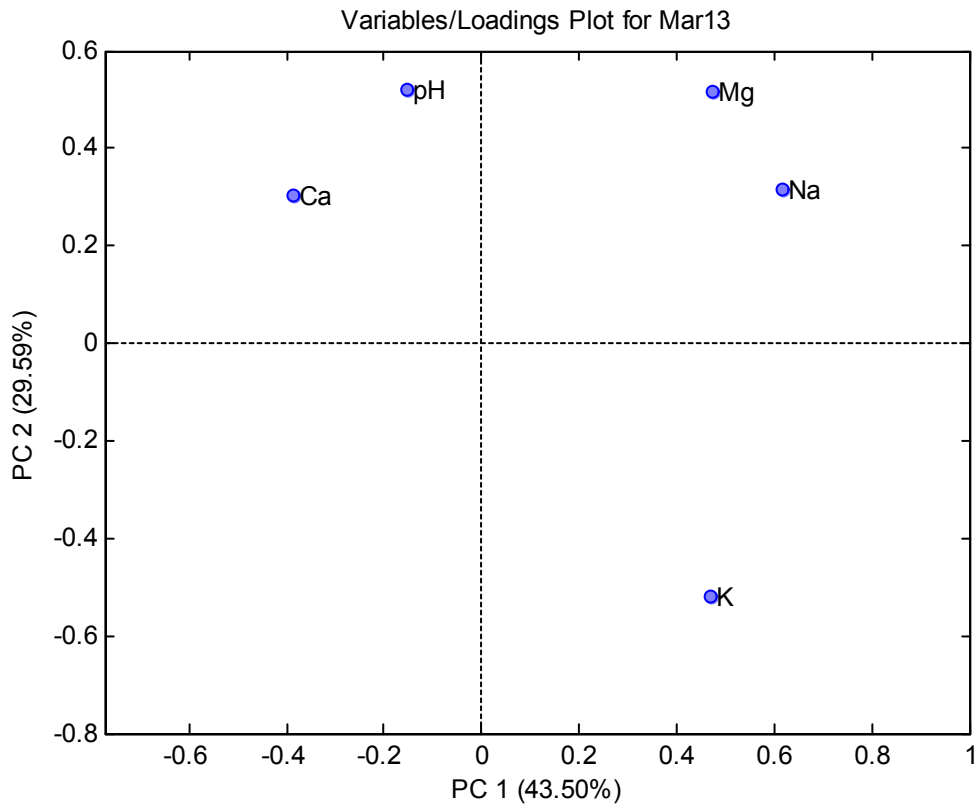

Samples/Scores Plot of Jul13

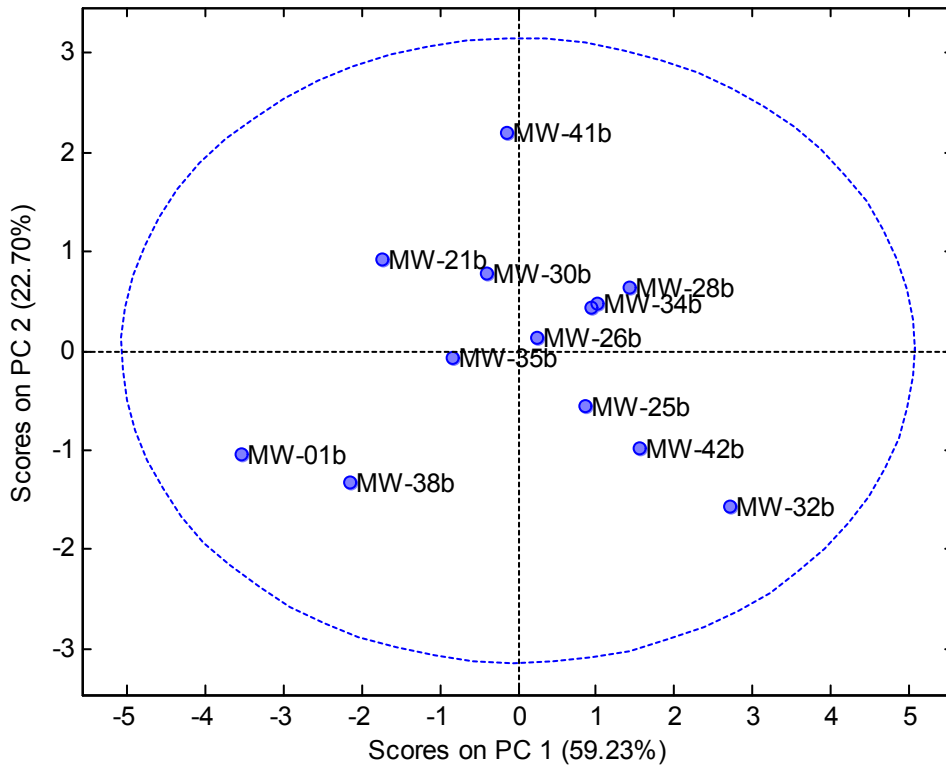

Variables/Loadings Plot for Jul13

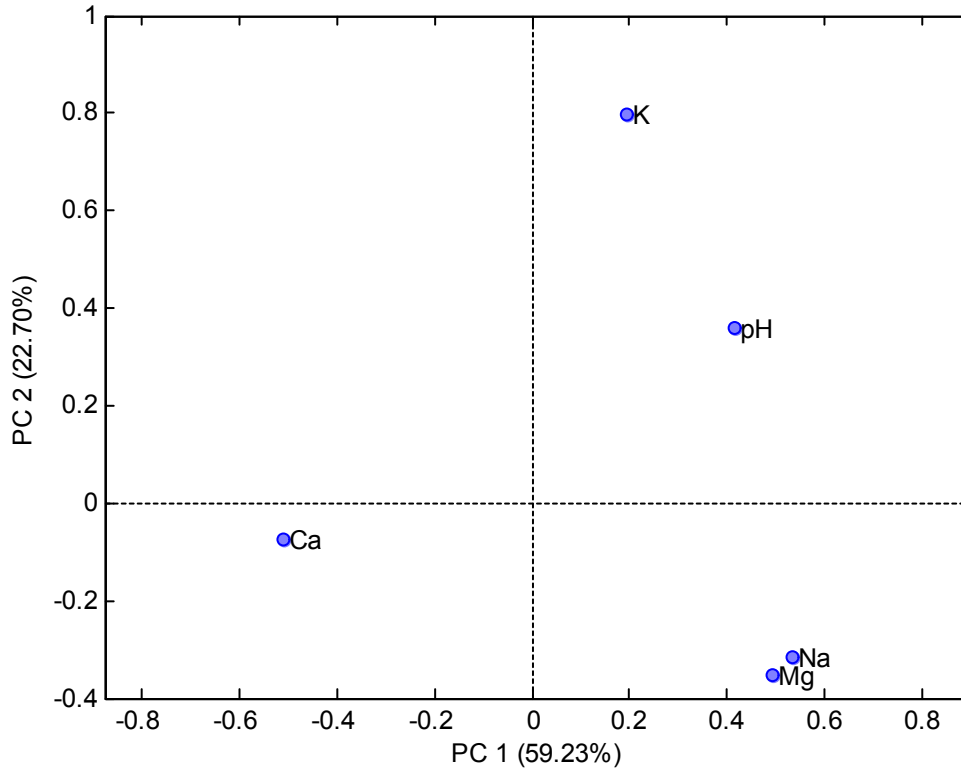

Table. DIC (raw data)

| Well     |    | Counts | DIC      | Av DIC $\mu\text{M}$ | S.E.    |
|----------|----|--------|----------|----------------------|---------|
| S5-MW-01 | t0 | 208287 | 7473.11  |                      |         |
| S5-MW-01 | t1 | 200997 | 7211.55  | 7342.33              | 130.78  |
| S5-MW-03 | t0 | 353109 | 12959.81 |                      |         |
| S5-MW-03 | t1 | 334503 | 12276.93 | 12618.37             | 341.44  |
| S5-MW-10 | t0 | 132626 | 4925.08  |                      |         |
| S5-MW-10 | t1 | 135072 | 5015.91  | 4970.495             | 45.415  |
| S5-MW-21 | t0 | 313258 | 11632.87 |                      |         |
| S5-MW-21 | t1 | 304929 | 11323.57 | 11478.22             | 154.65  |
| S5-MW-25 | t0 | 365016 | 13396.82 |                      |         |
| S5-MW-25 | t1 | 361527 | 13268.77 | 13332.795            | 64.025  |
| S5-MW-26 | t0 | 360564 | 13360.96 |                      |         |
| S5-MW-26 | t1 | 371749 | 13775.43 | 13568.195            | 207.235 |
| S5-MW-27 | t0 | 339996 | 12198.68 |                      |         |
| S5-MW-27 | t1 | 335280 | 12029.47 | 12114.075            | 84.605  |
| S5-MW-30 | t0 | 355945 | 13218.05 |                      |         |
| S5-MW-30 | t1 | 360803 | 13398.46 | 13308.255            | 90.205  |
| S5-MW-32 | t0 | 473500 | 17378.4  |                      |         |
| S5-MW-32 | t1 | 464108 | 17033.7  | 17206.05             | 172.35  |
| S5-MW-33 | t0 | 241368 | 8944.07  |                      |         |
| S5-MW-33 | t1 | 247075 | 9155.54  | 9049.805             | 105.735 |
| S5-MW-34 | t0 | 352966 | 12664.03 |                      |         |
| S5-MW-34 | t1 | 336509 | 12073.57 | 12368.8              | 295.23  |
| S5-MW-35 | t0 | 387472 | 13902.07 |                      |         |
| S5-MW-35 | t1 | 394388 | 14150.2  | 14026.135            | 124.065 |
| S5-MW-38 | t0 | 321091 | 11520.39 |                      |         |
| S5-MW-38 | t1 | 311099 | 11161.89 | 11341.14             | 179.25  |
| S5-MW-41 | t0 | 302590 | 11212.69 |                      |         |
| S5-MW-41 | t1 | 309543 | 11470.34 | 11341.515            | 128.825 |
| S5-MW-42 | t0 | 437589 | 16060.4  |                      |         |
| S5-MW-42 | t1 | 448633 | 16465.73 | 16263.065            | 202.665 |

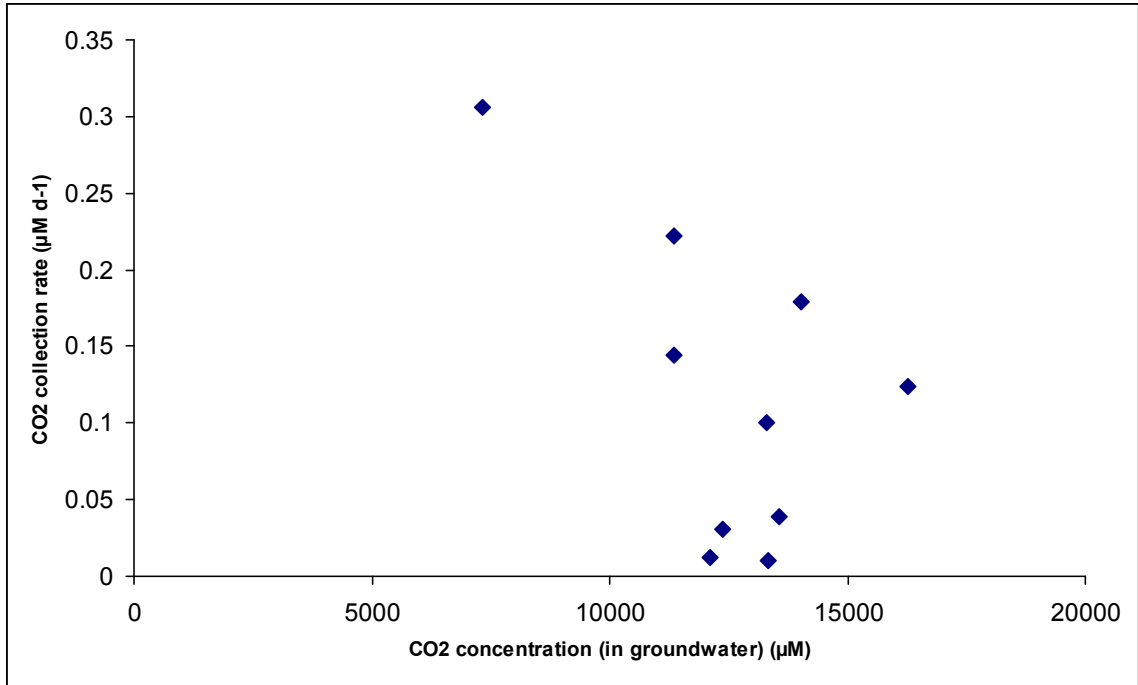

Supplement: c4em00514g4.pdf [file c4em00514g4.pdf]
