# Supplementary material for: Combined radiocarbon and CO2 flux measurements used to determine in situ chlorinated solvent mineralization rate
Source: Royal Society of Chemistry journal article supplement (doi:10.1039/c4em00514g), 2015-01-01
Supplement: c4em00514g3.pdf [file c4em00514g3.pdf]

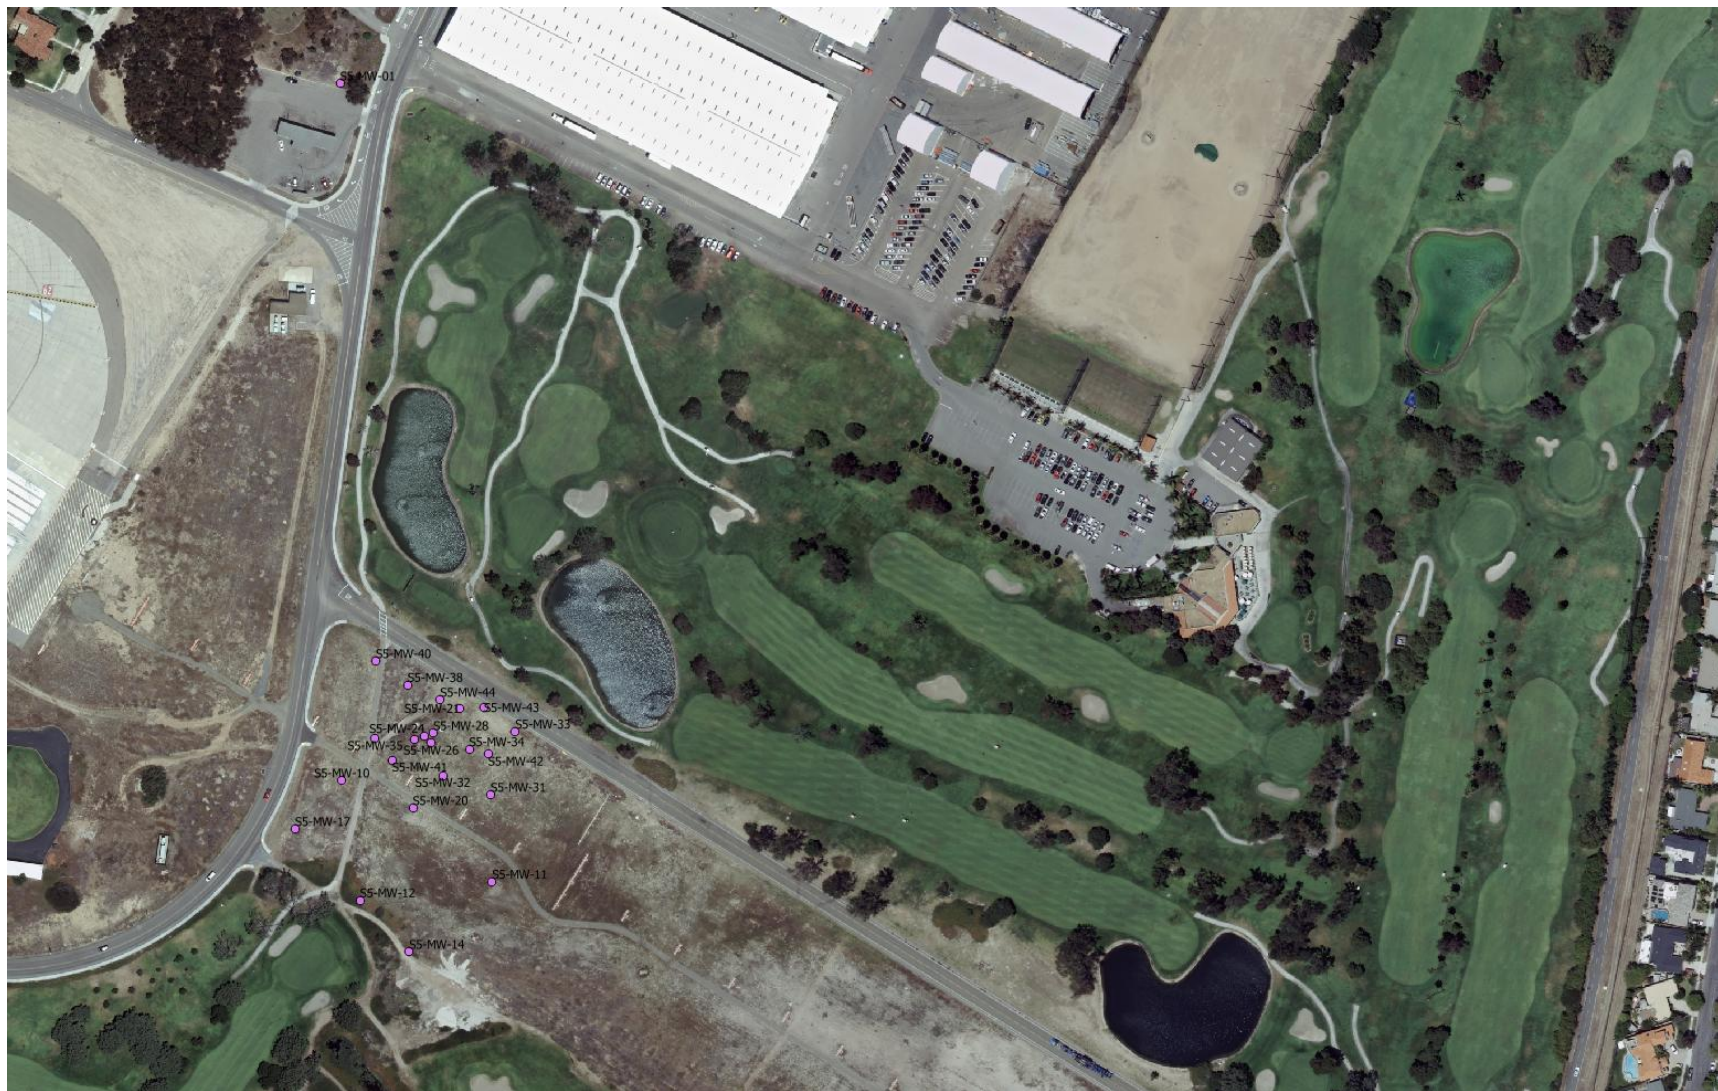

Entire site - S5-MW-01 upper left

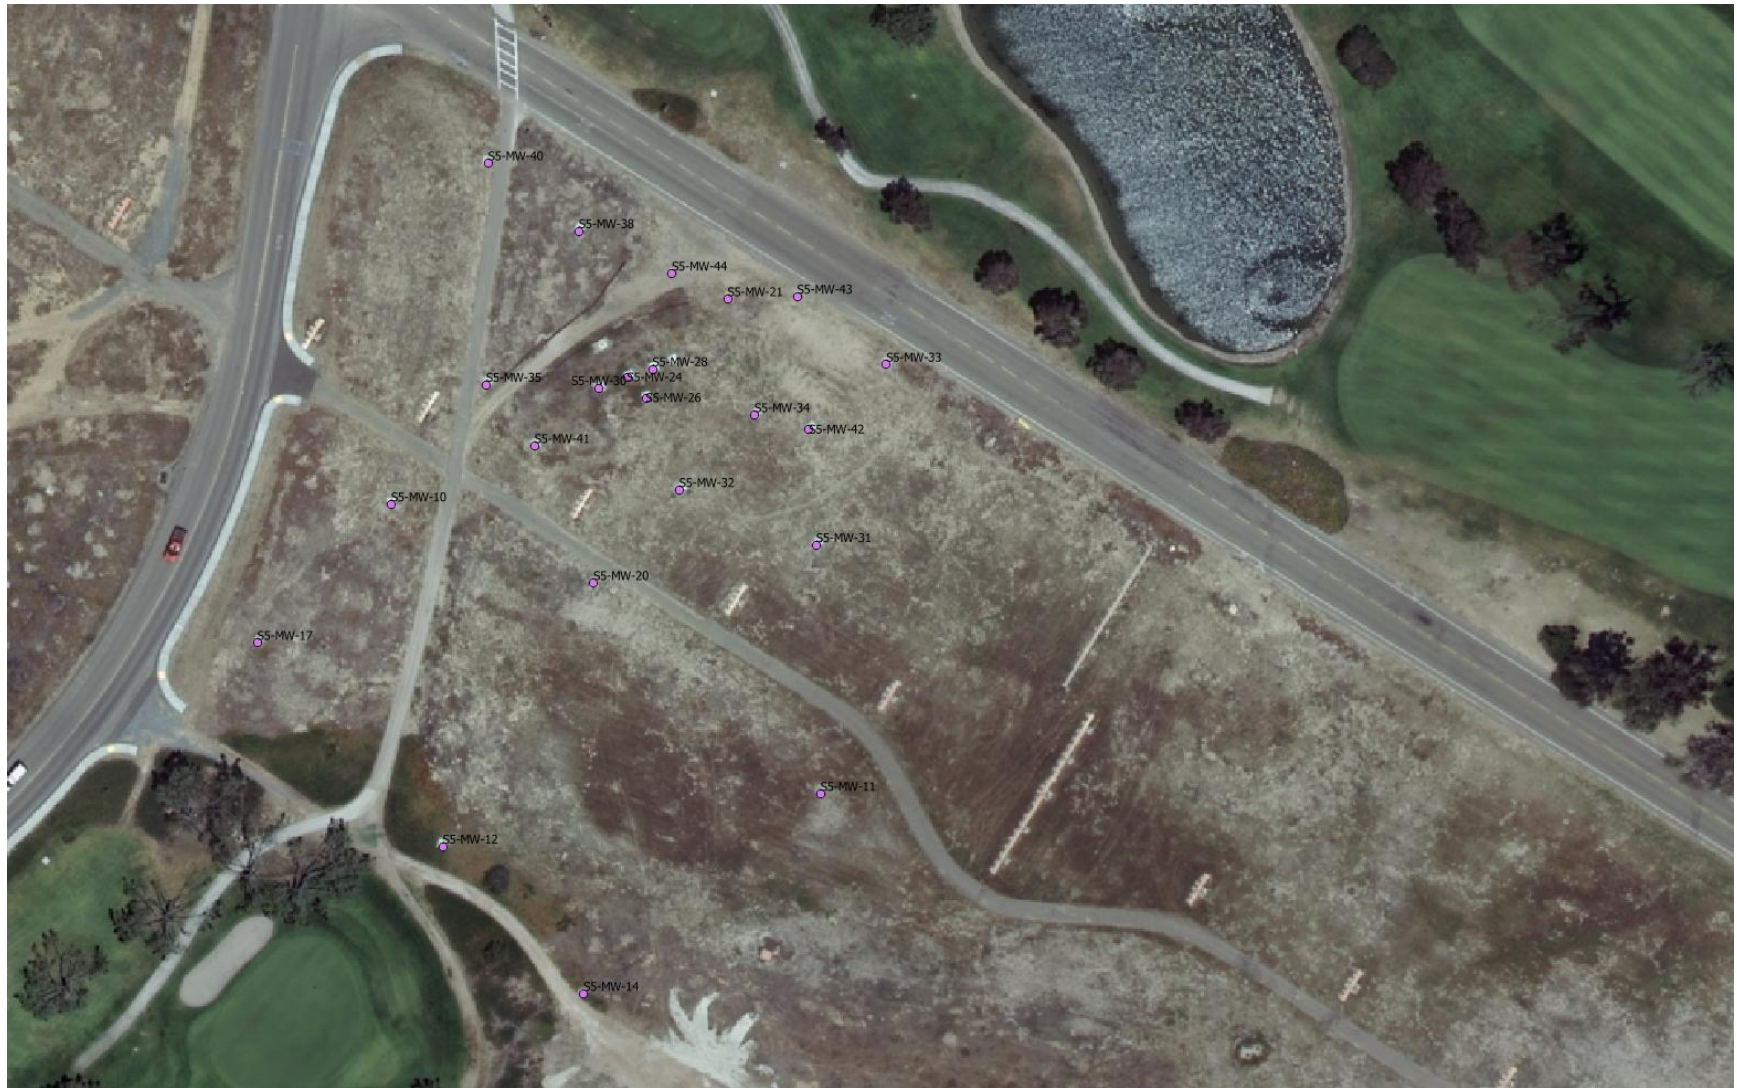

Central site - wells sampled March 2013 for cations

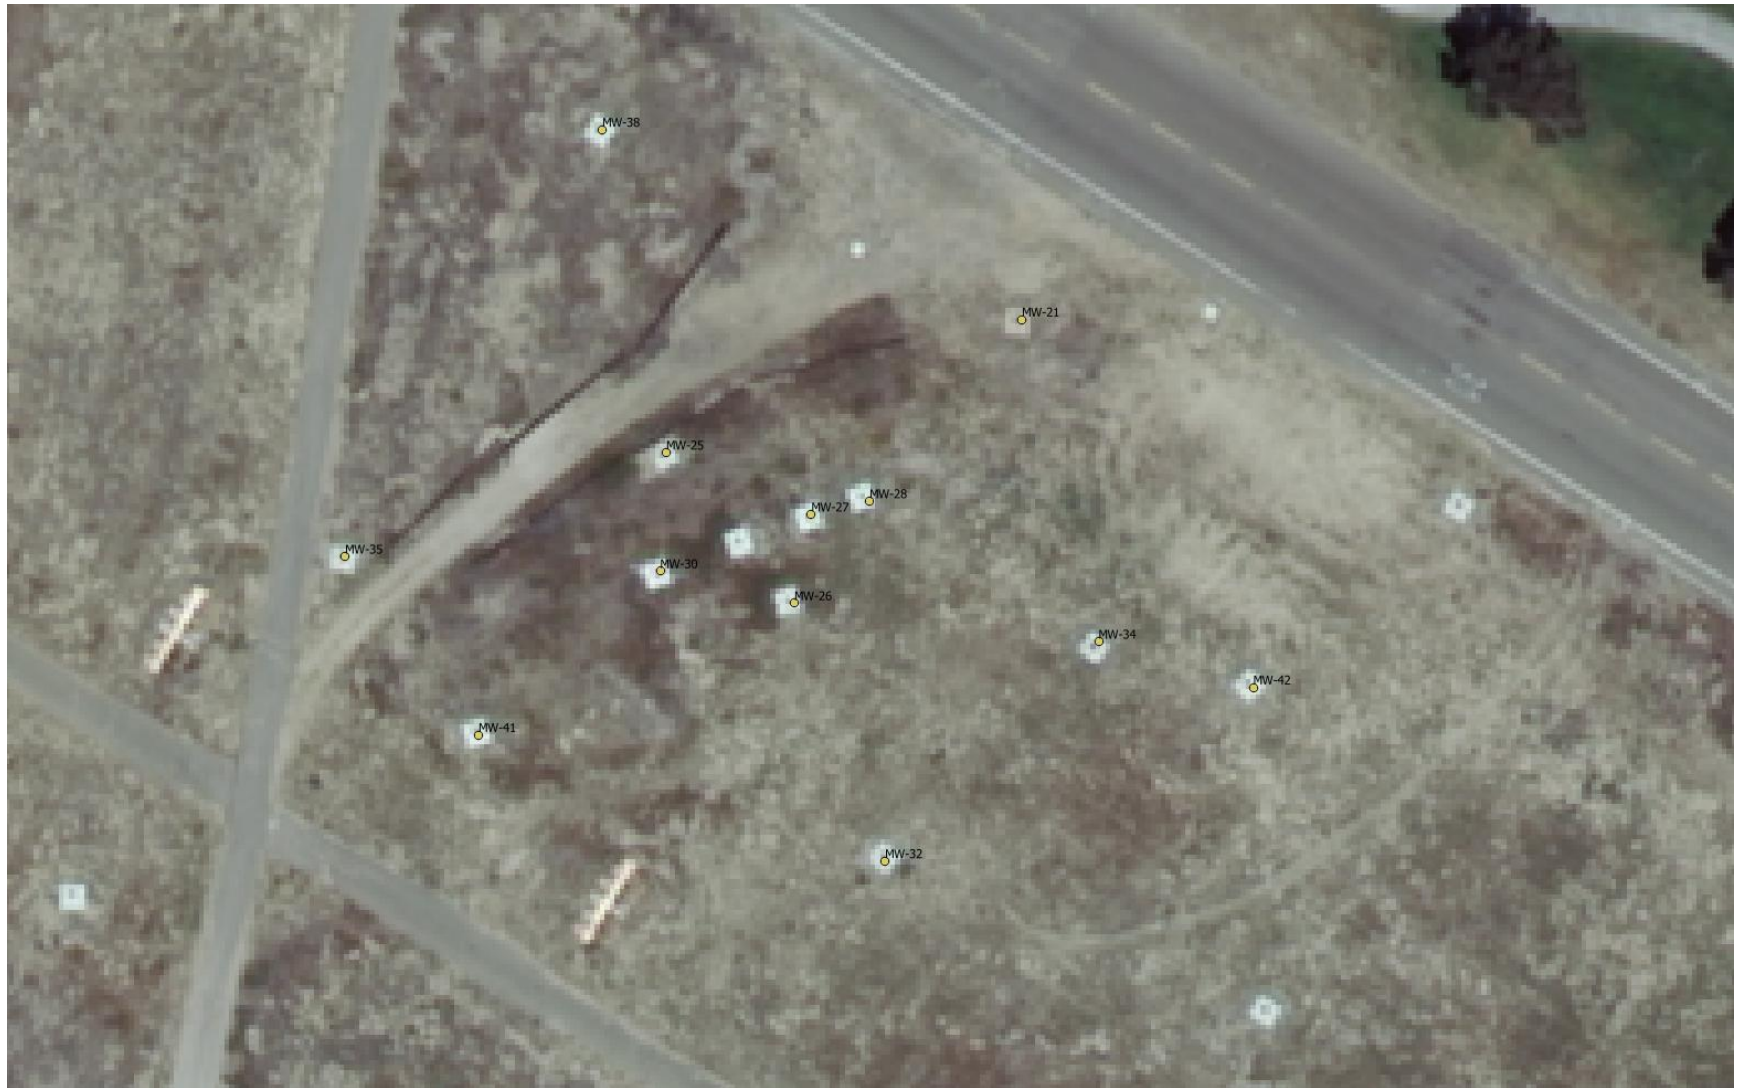

Central well cluster (July-August 2013 sampling)

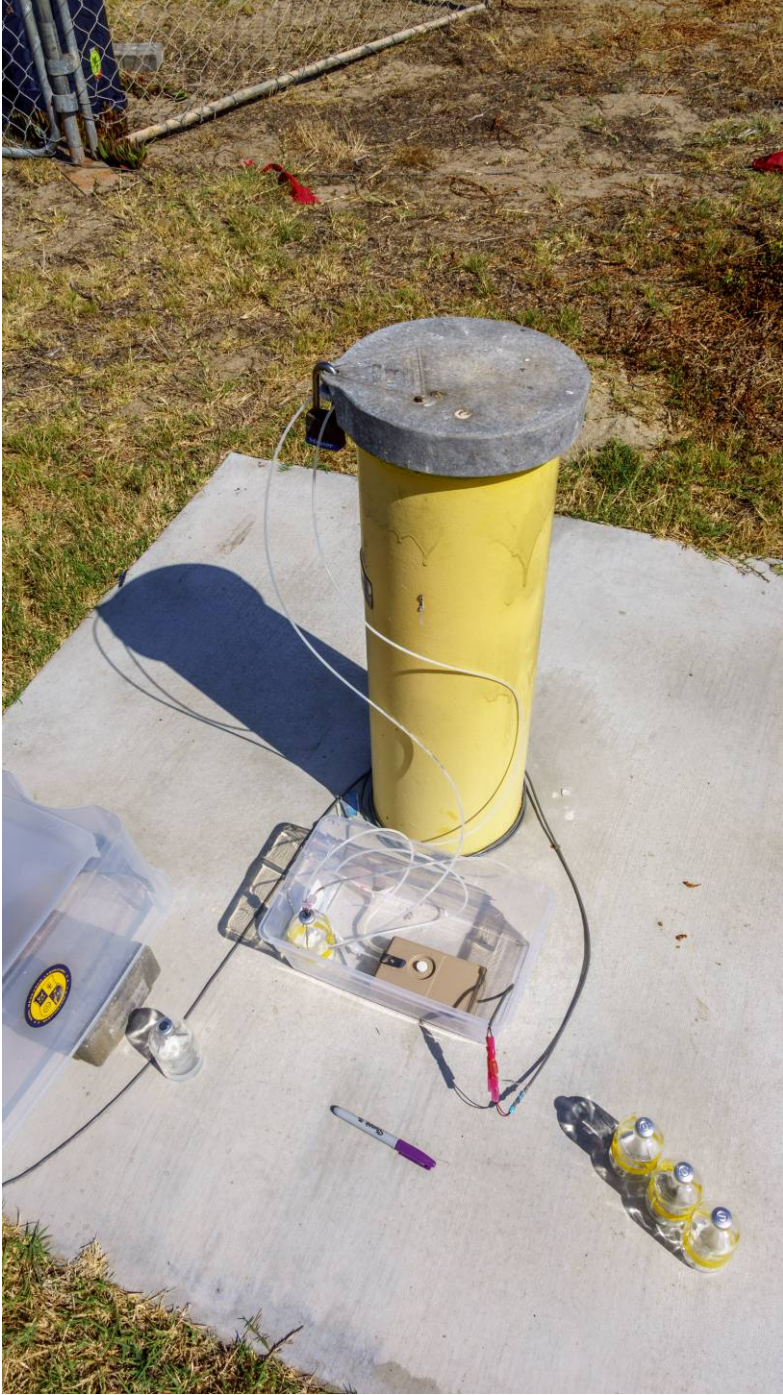

Pump deployment at well (traps are serum bottles)

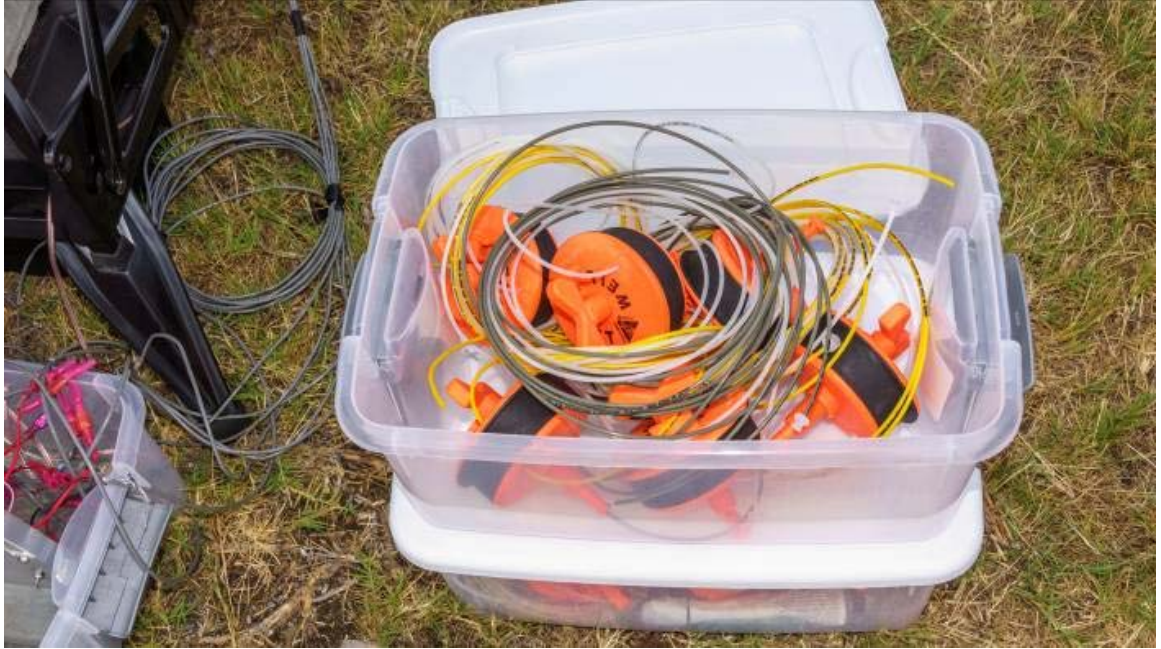

Modified well caps (sealed sample and return lines)

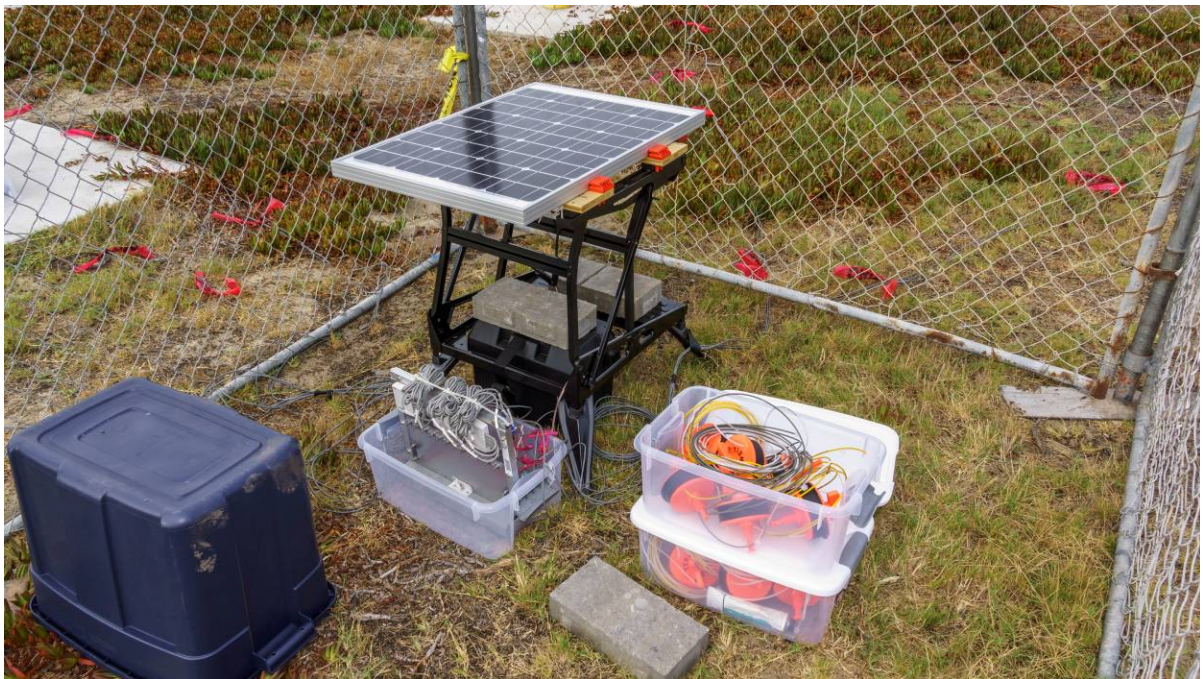

Collection system before deployment

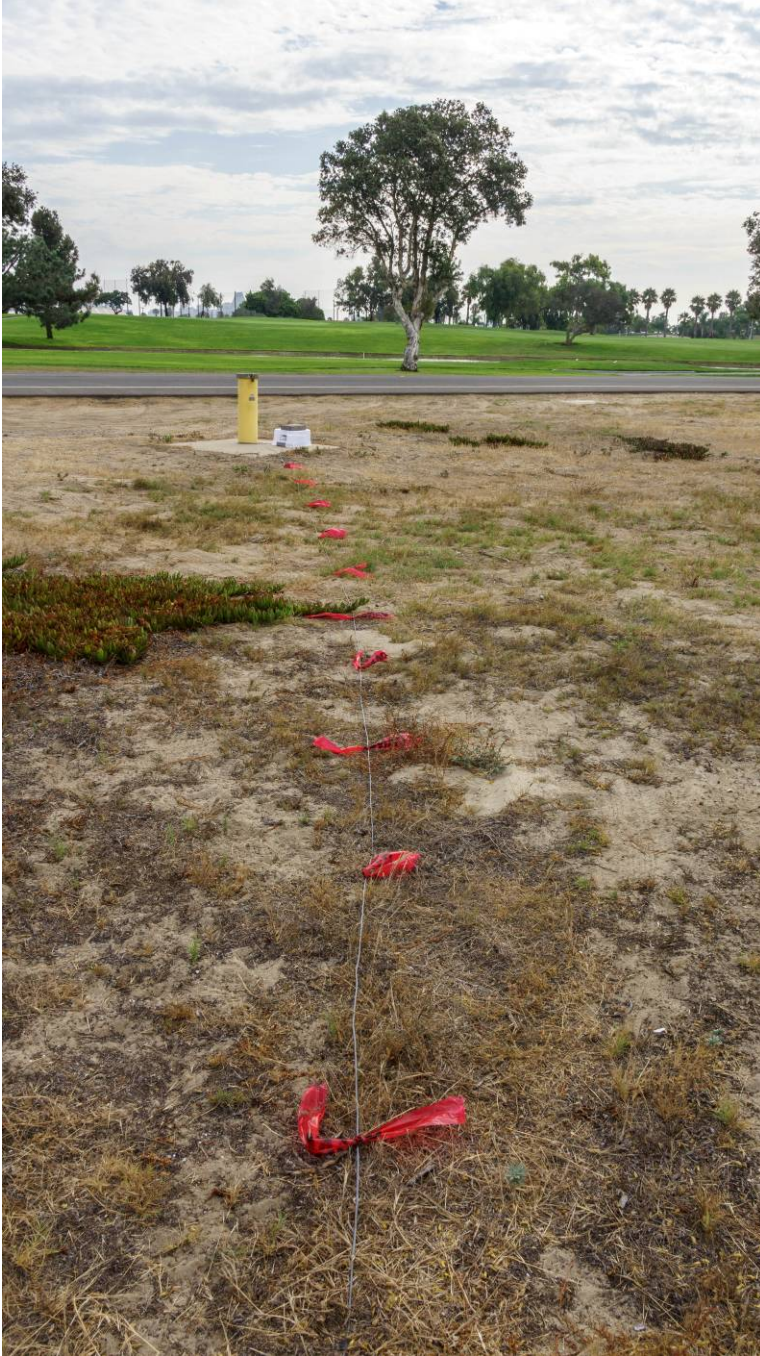

Wiring from control unit to well

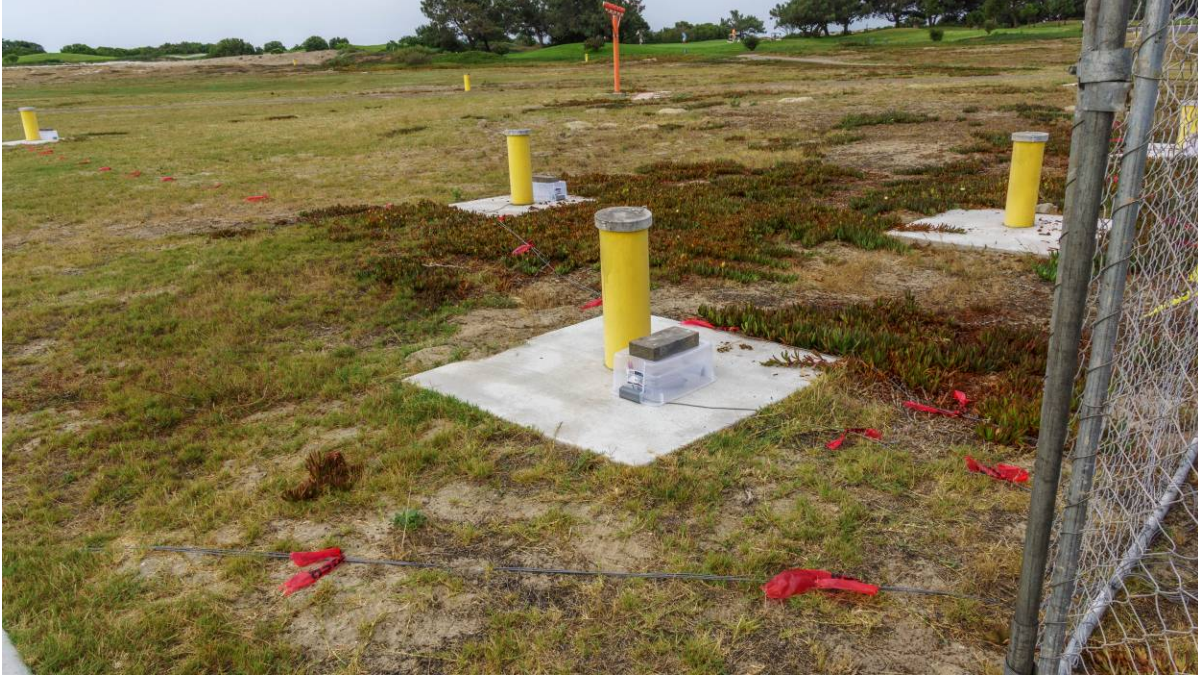

Collection systems
